# Supplementary material for: Molecular Fingerprints of Borderline Changes in Kidney Allografts Are Influenced by Donor Category
Source: PubMed Central journal article supplement (PMC7109293; doi:10.3389/fimmu.2020.00423), 2020-03-25

## *Supplementary Material*

### 1 Supplementary Figures and Tables

**Supplemental Table 1.** Demographic of patients with early BL in subgroups of SCD, ECD and living donors.

|                            | <b>SCD</b><br>(n=109) | <b>ECD</b><br>(n=109) | <b>LD</b><br>(n=51) | P value*<br>ECD vs SCD<br>vs LD | P<br>value#<br>ECD vs<br>SCD |
|----------------------------|-----------------------|-----------------------|---------------------|---------------------------------|------------------------------|
| Donor age, years           | 40 [4,75]             | 61 [4,79]             | 51 [30,76]          | <b>&lt;0.001</b>                | <b>&lt;0.001</b>             |
| Recipient age, years       | 50 [20,80]            | 55 [28,75]            | 42 [19,67]          | <b>&lt;0.001</b>                | <b>0.029</b>                 |
| Peak PRA                   | 4 [0,89]              | 4 [0,100]             | 0 [0,46]            | <b>&lt;0.001</b>                | 0.596                        |
| HLA mismatch               | 4 [0,6]               | 3 [0,6]               | 3 [0,6]             | 0.313                           | 0.127                        |
| Cold ischemia, hours       | 15.4 [0,25]           | 16.9[0,27]            | 0.8 [0,24]          | <b>&lt;0.001</b>                | <b>0.020</b>                 |
| Dialysis vintage, months   | 23.4 [0,110]          | 22[1,128.4]           | 3.5 [0,144]         | <b>&lt;0.001</b>                | 0.945                        |
| DGF, n (%)                 | 35 (31.8%)            | 40 (36.7%)            | 3 (5.9%)            | <b>&lt;0.001</b>                | 0.479                        |
| Recipient sex, male, n (%) | 76 (69.7%)            | 83 (76.1%)            | 42 (82.4%)          | 0.209                           | 0.361                        |
| Retransplantation, n (%)   | 14 (12.7%)            | 11 (10.1%)            | 0                   | <b>0.027</b>                    | 0.164                        |
| Donor sex, male, n (%)     | 56 (45.2%)            | 58 (46.8%)            | 10 (8.1%)           | <b>&lt;0.001</b>                | 0.893                        |

\*Differences among groups were calculated by Kruskal-Wallis test.

# Differences among groups were calculated by Mann/Whitney test.

**Supplemental Table 2.** Histological findings of biopsies with early BL in subgroups of SCD, ECD and LD analyzed by microarray.

| Banff score                         | SCD (n=4) | ECD (n=9) | LD (n=8)  | P value (ANOVA) |
|-------------------------------------|-----------|-----------|-----------|-----------------|
| Glomerulitis (g)                    | 0±0       | 0.22±0.44 | 0.13±0.35 | 0.620           |
| Chronic glomerulopathy (cg)         | 0±0       | 0±0       | 0±0       | 1               |
| Interstitial inflammation (i)       | 0.5±0.58  | 0.67±0.5  | 0.63±0.74 | 0.904           |
| Tubulitis (t)                       | 1.0±0     | 1.23±0.67 | 1.5±0.93  | 0.515           |
| Total inflammation (ti)             | 0.75±0.5  | 0.67±0.8  | 0.5±0.76  | 0.767           |
| Tubular atrophy (ct/TA)             | 0.5±0.58  | 0.89±0.6  | 0.75±0.46 | 0.528           |
| Interstitial fibrosis (ci/IF)       | 0.25±0.5  | 0.56±0.73 | 0.63±0.52 | 0.607           |
| Vascular intimal fibrosis (cv)      | 0.75±0.5  | 1.61±0.93 | 0.63±0.52 | <b>0.028</b>    |
| Arteriolar hyalinosis (ah)          | 1.25±1.2  | 1.31±1.11 | 0.88±0.99 | 0.699           |
| Arteriolar hyaline thickening (aah) | 0.5±1     | 0.44±1    | 0.25±0.7  | 0.870           |
| Peritubular capillaritis (ptc)      | 0±0       | 0.22±0.67 | 0±0       | 0.537           |

## 1.1 Supplementary Figures

**Supplemental Figure 1.** Kidney graft function during 3 years follow-up after indication biopsy stratified by donor category. SCD vs LD,  $p=0.48$ . SCD vs ECD,  $p<0.001$ , LD vs ECD,  $p<0.001$ . Differences in kidney graft function among SCD, ECD and LD were calculated by GLM repeated model.

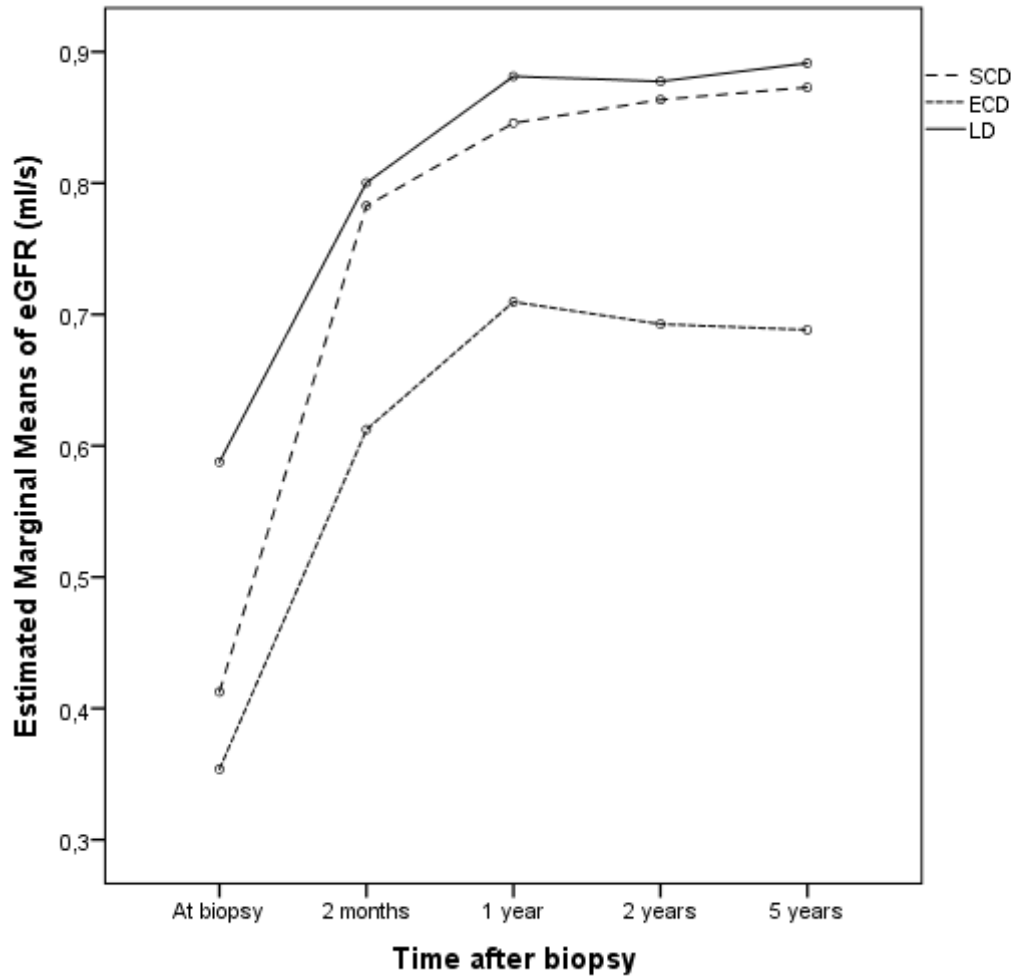

**Supplemental Figure 2.** Five-year graft survival (A.) and Rejection-free interval (B.) of patients with early borderline changes according to donor category.

**A.**

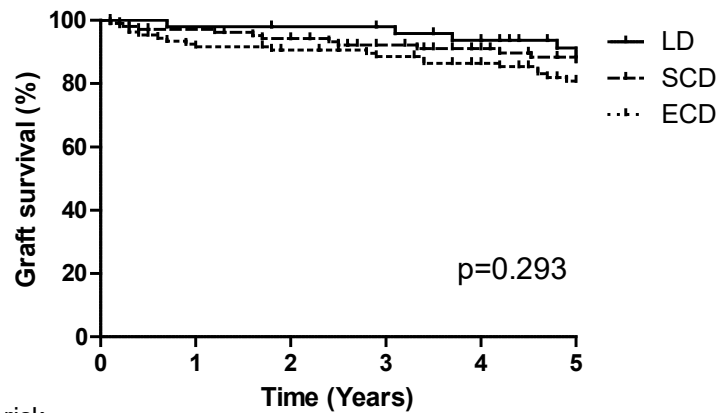

| Subjects at risk | 0   | 1   | 2  | 3  | 4  | 5  |
|------------------|-----|-----|----|----|----|----|
| LD               | 51  | 51  | 50 | 48 | 43 | 37 |
| SCD              | 109 | 102 | 97 | 82 | 71 | 63 |
| ECD              | 109 | 98  | 95 | 87 | 80 | 68 |

**B.**

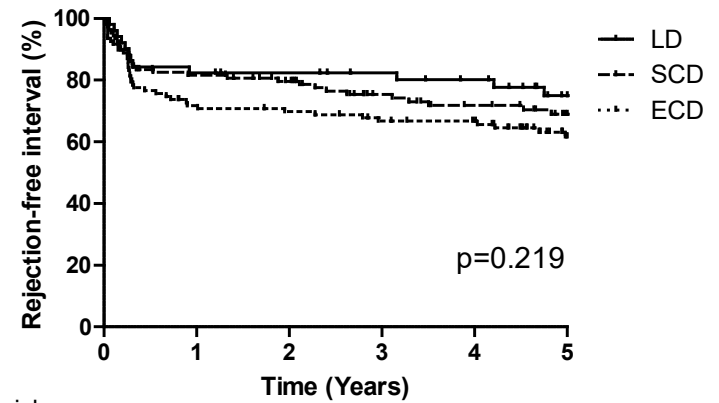

| Subjects at risk | 0   | 1  | 2  | 3  | 4  | 5  |
|------------------|-----|----|----|----|----|----|
| LD               | 51  | 43 | 41 | 38 | 35 | 24 |
| SCD              | 109 | 88 | 80 | 65 | 56 | 46 |
| ECD              | 109 | 74 | 71 | 66 | 63 | 40 |

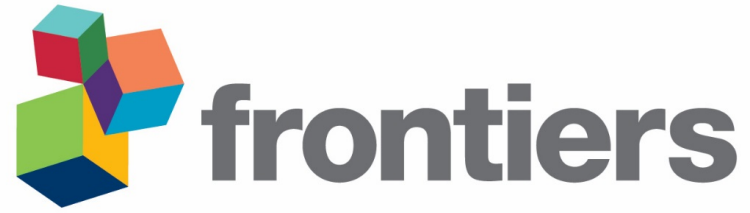

Supplement: Data_Sheet_1.pdf [file Data_Sheet_1.pdf]
